# Supplementary material for: Understanding Reasons for Vaccination Hesitancy and Implementing Effective Countermeasures: An Online Survey of Individuals Unvaccinated against COVID-19
Source: MDPI journal article supplement (doi:10.3390/vaccines12050499), 2024-05-05
Supplement: s1 [file s1]

Table S1. Structure of the questionnaire.

| Questions        | Options                                                                                                                                                                                                                                                   | Answer type       |
|------------------|-----------------------------------------------------------------------------------------------------------------------------------------------------------------------------------------------------------------------------------------------------------|-------------------|
| Sex              | Male<br>Female                                                                                                                                                                                                                                            | single-answer     |
| Age              |                                                                                                                                                                                                                                                           | number-completion |
| Marriage         | Not married (including divorced or bereaved)<br>married                                                                                                                                                                                                   | single-answer     |
| Have children    | Yes<br>No                                                                                                                                                                                                                                                 | single-answer     |
| Family income    | Less than 2 million yen<br>2–4 million yen<br>4–6 million yen<br>6–8 million yen<br>8–10 million yen<br>10–12 million yen<br>12–15 million yen<br>15–20 million yen<br>More than 20 million yen<br>Do not know                                            | single-answer     |
| Private income   | Less than 2 million yen<br>2–4 million yen<br>4–6 million yen<br>6–8 million yen<br>8–10 million yen<br>10–12 million yen<br>12–15 million yen<br>15–20 million yen<br>More than 20 million yen<br>Do not know                                            | single-answer     |
| Occupation       | Unemployed<br>Part-time job<br>Housewife (househusband)<br>Company employee (other)<br>Company employee (clerical)<br>Self-employed<br>Company employee (technical)<br>Free Business<br>Student<br>Other (free text)<br>Civil servants<br>Manager/Officer | single-answer     |
| Student category | Vocational school student                                                                                                                                                                                                                                 | single-answer     |

|                                                            |                         |                 |
|------------------------------------------------------------|-------------------------|-----------------|
|                                                            | Junior college student  |                 |
|                                                            | College student         |                 |
|                                                            | Graduate student        |                 |
|                                                            | Others                  |                 |
| Number of COVID-19 vaccination                             |                         | single-answer   |
|                                                            | 0                       |                 |
|                                                            | 1                       |                 |
|                                                            | 2                       |                 |
|                                                            | 3                       |                 |
|                                                            | 4                       |                 |
|                                                            | more than 5             |                 |
| Reasons for declining COVID-19 vaccination                 |                         |                 |
| Busy.                                                      | Likert scale            | single-answer   |
| Convenience to the venue is not good.                      | Likert scale            | single-answer   |
| Booking is troublesome.                                    | Likert scale            | single-answer   |
| COVID-19 infection does not cause severe illness.          | Likert scale            | single-answer   |
| No infection with COVID-19.                                | Likert scale            | single-answer   |
| Vaccine ineffectiveness.                                   | Likert scale            | single-answer   |
| Already infected with COVID-19.                            | Likert scale            | single-answer   |
| Other infection control measures.                          | Likert scale            | single-answer   |
| Concerns about adverse reactions.                          | Likert scale            | single-answer   |
| Concerns about vaccine safety.                             | Likert scale            | single-answer   |
| Concerns about long-term effects of the vaccine.           | Likert scale            | single-answer   |
| Pregnant and worried about the impact on the fetus.        | Likert scale            | single-answer   |
| Concerns about impact on pre-existing medical conditions.  | Likert scale            | single-answer   |
| There is distrust of vaccine development and regulators.   | Likert scale            | single-answer   |
| Information from the government cannot be trusted.         | Likert scale            | single-answer   |
| Distrust of healthcare in general.                         | Likert scale            | single-answer   |
| Few people around me have been infected with the COVID-19. | Likert scale            | single-answer   |
| Few people around me are vaccinated.                       | Likert scale            | single-answer   |
| People around me experienced severe adverse reactions.     | Likert scale            | single-answer   |
| My doctor told me.                                         | Likert scale            | single-answer   |
| Religious reason.                                          | Likert scale            | single-answer   |
| Comorbidity                                                |                         | multiple-answer |
|                                                            | Hypertension            |                 |
|                                                            | Diabetes mellitus       |                 |
|                                                            | Bronchial asthma        |                 |
|                                                            | Anaphylactic shock      |                 |
|                                                            | Psychiatric disorders   |                 |
|                                                            | Gout                    |                 |
|                                                            | Lipid disorders         |                 |
|                                                            | Rheumatoid arthritis    |                 |
|                                                            | Respiratory diseases    |                 |
|                                                            | Cardiovascular diseases |                 |

|                                                                           |                                                     |                  |
|---------------------------------------------------------------------------|-----------------------------------------------------|------------------|
|                                                                           | Allergic diseases                                   |                  |
|                                                                           | Immunodeficiency diseases                           |                  |
|                                                                           | Malignant tumors                                    |                  |
|                                                                           | Thyroid diseases                                    |                  |
|                                                                           | Liver disease                                       |                  |
|                                                                           | Kidney disease                                      |                  |
|                                                                           | Others                                              | free-text answer |
| Influenza vaccination after 2019.                                         | None                                                | single-answer    |
|                                                                           | Yes                                                 |                  |
|                                                                           | None                                                |                  |
| Infected with SARS-CoV-2                                                  |                                                     | single-answer    |
|                                                                           | Yes                                                 |                  |
|                                                                           | No                                                  |                  |
| Symptoms after SARS-CoV-2 infection.                                      |                                                     | multiple-answer  |
|                                                                           | No symptoms                                         |                  |
|                                                                           | fever                                               |                  |
|                                                                           | Cough                                               |                  |
|                                                                           | Sore throat                                         |                  |
|                                                                           | Headache                                            |                  |
|                                                                           | Joint and muscle pain                               |                  |
|                                                                           | Taste or smell disorders                            |                  |
|                                                                           | diarrhea                                            |                  |
|                                                                           | Lethargy                                            |                  |
|                                                                           | Breathlessness                                      |                  |
|                                                                           | Inability to speak, move or consciousness disorders |                  |
|                                                                           | Skin rashes                                         |                  |
|                                                                           | Eye irritation or pain                              |                  |
|                                                                           | Chest pain                                          |                  |
|                                                                           | Other                                               | free-text answer |
| COVID-19 conspiracy beliefs                                               |                                                     |                  |
| Big pharma is encouraging the spread of COVID-19 to make money            |                                                     | single-answer    |
|                                                                           | Yes                                                 |                  |
|                                                                           | No                                                  |                  |
| COVID-19 was developed by the government as part of a bioweapons program. |                                                     | single-answer    |
|                                                                           | Yes                                                 |                  |
|                                                                           | No                                                  |                  |
| 5G is causing the COVID-19                                                |                                                     | single-answer    |
|                                                                           | Yes                                                 |                  |
|                                                                           | No                                                  |                  |
| The COVID-19 is a myth to force vaccinations on people                    |                                                     | single-answer    |
|                                                                           | Yes                                                 |                  |
|                                                                           | No                                                  |                  |
| There is no such thing as the COVID-19                                    |                                                     | single-answer    |
|                                                                           | Yes                                                 |                  |

|                                                              |                                           |                  |
|--------------------------------------------------------------|-------------------------------------------|------------------|
|                                                              | No                                        |                  |
| Trusted sources                                              |                                           |                  |
| Facebook                                                     | Likert scale                              | single-answer    |
| Twitter                                                      | Likert scale                              | single-answer    |
| Instagram                                                    | Likert scale                              | single-answer    |
| YouTube                                                      | Likert scale                              | single-answer    |
| Government                                                   | Likert scale                              | single-answer    |
| Public health center                                         | Likert scale                              | single-answer    |
| Television                                                   | Likert scale                              | single-answer    |
| Newspaper                                                    | Likert scale                              | single-answer    |
| Weekly magazine                                              | Likert scale                              | single-answer    |
| Primary care physician                                       | Likert scale                              | single-answer    |
| Healthcare professional                                      | Likert scale                              | single-answer    |
| Pharmaceutical company                                       | Likert scale                              | single-answer    |
| Friend                                                       | Likert scale                              | single-answer    |
| Family                                                       | Likert scale                              | single-answer    |
| Others (free text)                                           | Likert scale                              | single-answer    |
| What information do you want to know about COVID-19 vaccine? |                                           | multiple-answer  |
|                                                              | Adverse Reactions                         |                  |
|                                                              | Safety                                    |                  |
|                                                              | Efficacy                                  |                  |
|                                                              | Genetic Effects                           |                  |
|                                                              | Cost                                      |                  |
|                                                              | Future COVID-19 vaccination schedule      |                  |
|                                                              | None in particular                        |                  |
| Disadvantages of not vaccinated                              |                                           | multiple-answer  |
|                                                              | Discriminated against for not vaccinating |                  |
|                                                              | Forced to vaccinate                       |                  |
|                                                              | I was fired from my job                   |                  |
|                                                              | Infected with SARS-CoV-2                  |                  |
|                                                              | Other                                     | free-text answer |
|                                                              | None in particular                        |                  |

---

The Likert scale options were as follows: 1, not at all applicable; 2, not very much; 3, cannot say either way; 4, somewhat true; and 5, very applicable.

Table S2. Tabulation of reasons for declining COVID-19 vaccination

|                                                               | Very applicable | Somewhat true | Cannot say either way | Not very much | Not at all applicable |
|---------------------------------------------------------------|-----------------|---------------|-----------------------|---------------|-----------------------|
| Busy.                                                         | 20 (7.6)        | 30 (11.5)     | 77 (29.4)             | 33 (12.6)     | 102 (38.9)            |
| Convenience to the venue is not good.                         | 21 (8.0)        | 22 (8.4)      | 86 (32.8)             | 39 (14.9)     | 94 (35.9)             |
| Booking is troublesome.                                       | 43 (16.4)       | 41 (15.6)     | 67 (25.6)             | 34 (13)       | 77 (29.4)             |
| COVID-19 infection does not cause severe illness.             | 26 (9.9)        | 42 (16)       | 101 (38.5)            | 33 (12.6)     | 60 (22.9)             |
| No infection with COVID-19.                                   | 14 (5.3)        | 15 (5.7)      | 107 (40.8)            | 33 (12.6)     | 93 (35.5)             |
| Vaccine ineffectiveness.                                      | 58 (22.1)       | 33 (12.6)     | 104 (39.7)            | 34 (13)       | 33 (12.6)             |
| Already infected with COVID-19.                               | 37 (14.1)       | 17 (6.5)      | 39 (14.9)             | 13 (5)        | 156 (59.5)            |
| Other infection control measures.                             | 34 (13)         | 51 (19.5)     | 74 (28.2)             | 26 (9.9)      | 77 (29.4)             |
| Concerns about adverse reactions.                             | 154 (58.8)      | 56 (21.4)     | 29 (11.1)             | 6 (2.3)       | 17 (6.5)              |
| Concerns about vaccine safety.                                | 147 (56.1)      | 52 (19.8)     | 35 (13.4)             | 10 (3.8)      | 18 (6.9)              |
| Concerns about long-term effects of the vaccine.              | 107 (40.8)      | 53 (20.2)     | 59 (22.5)             | 16 (6.1)      | 27 (10.3)             |
| Pregnant and worried about the impact on the fetus.           | 7 (2.7)         | 8 (3.1)       | 41 (15.6)             | 10 (3.8)      | 196 (74.8)            |
| Concerns about the impact on pre-existing medical conditions. | 34 (13.0)       | 34 (13.0)     | 59 (22.5)             | 38 (14.5)     | 97 (37.0)             |
| There is distrust of vaccine development and regulators.      | 95 (36.3)       | 58 (22.1)     | 55 (21.0)             | 18 (6.9)      | 36 (13.7)             |
| Information from the government cannot be trusted.            | 88 (33.6)       | 58 (22.1)     | 65 (24.8)             | 20 (7.6)      | 31 (11.8)             |
| Distrust of healthcare in general.                            | 41 (15.6)       | 57 (21.8)     | 81 (30.9)             | 35 (13.4)     | 48 (18.3)             |
| Few people around me have been infected with the COVID-19.    | 32 (12.2)       | 56 (21.4)     | 69 (26.3)             | 53 (20.2)     | 52 (19.8)             |
| Few people around me are vaccinated.                          | 15 (5.7)        | 20 (7.6)      | 83 (31.7)             | 61 (23.3)     | 83 (31.7)             |
| People around me experienced severe adverse reactions.        | 40 (15.3)       | 47 (17.9)     | 59 (22.5)             | 35 (13.4)     | 81 (30.9)             |
| My doctor told me.                                            | 8 (3.1)         | 8 (3.1)       | 48 (18.3)             | 20 (7.6)      | 178 (67.9)            |
| Religious reason.                                             | 3 (1.1)         | 1 (0.4)       | 34 (13)               | 19 (7.3)      | 205 (78.2)            |

Table S3. Tabulation of media that the participants trust

|                         | Very applicable | Somewhat true | Cannot say either way | Not very much | Not at all applicable |
|-------------------------|-----------------|---------------|-----------------------|---------------|-----------------------|
| Facebook                | 4 (1.5)         | 13 (5.0)      | 74 (28.2)             | 32 (12.2)     | 139 (53.1)            |
| Twitter                 | 16 (6.1)        | 38 (14.5)     | 73 (27.9)             | 37 (14.1)     | 98 (37.4)             |
| Instagram               | 8 (3.1)         | 17 (6.5)      | 82 (31.3)             | 34 (13.0)     | 121 (46.2)            |
| YouTube                 | 21 (8.0)        | 37 (14.1)     | 85 (32.4)             | 30 (11.5)     | 89 (34.0)             |
| Government              | 10 (3.8)        | 32 (12.2)     | 91 (34.7)             | 36 (13.7)     | 93 (35.5)             |
| Public health center    | 8 (3.1)         | 46 (17.6)     | 94 (35.9)             | 30 (11.5)     | 84 (32.1)             |
| Television              | 22 (8.4)        | 43 (16.4)     | 70 (26.7)             | 40 (15.3)     | 87 (33.2)             |
| Newspaper               | 12 (4.6)        | 28 (10.7)     | 80 (30.5)             | 44 (16.8)     | 98 (37.4)             |
| Weekly magazine         | 2 (0.8)         | 14 (5.3)      | 77 (29.4)             | 48 (18.3)     | 121 (46.2)            |
| Primary care physician  | 9 (3.4)         | 48 (18.3)     | 94 (35.9)             | 28 (10.7)     | 83 (31.7)             |
| Healthcare professional | 11 (4.2)        | 51 (19.5)     | 94 (35.9)             | 23 (8.8)      | 83 (31.7)             |
| Pharmaceutical company  | 3 (1.1)         | 21 (8.0)      | 95 (36.3)             | 39 (14.9)     | 104 (39.7)            |
| Friend                  | 15 (5.7)        | 43 (16.4)     | 108 (41.2)            | 30 (11.5)     | 66 (25.2)             |
| Family                  | 23 (8.8)        | 51 (19.5)     | 93 (35.5)             | 31 (11.8)     | 64 (24.4)             |
| Others                  | 21 (8.0)        | 6 (2.3)       | 46 (17.6)             | 5 (1.9)       | 184 (70.2)            |

Table S4 Basic characteristics of participants by clusters

| Cluster (N)<br>Variable (n (%))            | 1 (28)      | 2 (85)      | 3 (149)     | Univariable<br>p-value |
|--------------------------------------------|-------------|-------------|-------------|------------------------|
| Female                                     | 6 (21.4)    | 50 (58.8)   | 70 (47.0)   | <b>0.002</b>           |
| Age (mean [SD])                            | 42.5 [13.9] | 50.5 [13.5] | 47.6 [15.9] | <b>0.046</b>           |
| Marriage                                   | 11 (39.3)   | 40 (47.1)   | 57 (38.3)   | 0.41                   |
| Have Children                              | 10 (35.7)   | 47 (55.3)   | 61 (40.9)   | <b>0.012</b>           |
| Family income                              |             |             |             | <b>0.039</b>           |
| Less than 2 million yen                    | 1 (3.6)     | 9 (10.6)    | 29 (19.5)   |                        |
| 2–4 million yen                            | 5 (17.9)    | 25 (29.4)   | 31 (20.8)   |                        |
| 4–6 million yen                            | 7 (25.0)    | 15 (17.6)   | 31 (20.8)   |                        |
| 6–8 million yen                            | 4 (14.3)    | 6 (7.1)     | 15 (10.1)   |                        |
| 8–10 million yen                           | 3 (10.7)    | 6 (7.1)     | 9 (6.0)     |                        |
| 10–12 million yen                          | 0 (0.0)     | 4 (4.7)     | 2 (1.3)     |                        |
| 12–15 million yen                          | 1 (3.6)     | 2 (2.4)     | 2 (1.3)     |                        |
| 15–20 million yen                          | 0 (0.0)     | 0 (0.0)     | 1 (0.7)     |                        |
| More than 20 million yen                   | 0 (0.0)     | 1 (1.2)     | 0 (0.0)     |                        |
| Do not know                                | 6 (21.4)    | 17 (20.0)   | 29 (19.5)   |                        |
| Private income                             |             |             |             | <b>0.034</b>           |
| Less than 2 million yen                    | 8 (28.6)    | 35 (41.2)   | 69 (46.3)   |                        |
| 2–4 million yen                            | 4 (14.3)    | 23 (27.1)   | 33 (22.1)   |                        |
| 4–6 million yen                            | 8 (28.6)    | 7 (8.2)     | 14 (9.4)    |                        |
| 6–8 million yen                            | 1 (3.6)     | 2 (2.4)     | 5 (3.4)     |                        |
| 8–10 million yen                           | 0 (0.0)     | 3 (3.5)     | 5 (3.4)     |                        |
| 10–12 million yen                          | 0 (0.0)     | 0 (0.0)     | 1 (0.7)     |                        |
| 12–15 million yen                          | 0 (0.0)     | 0 (0.0)     | 0 (0.0)     |                        |
| 15–20 million yen                          | 0 (0.0)     | 1 (1.2)     | 0 (0.0)     |                        |
| More than 20 million yen                   | 6 (21.4)    | 14 (16.5)   | 21 (14.1)   |                        |
| Do not know                                |             |             |             |                        |
| Occupation                                 |             |             |             | 0.051                  |
| Civil servants                             | 0 (0.0)     | 1 (1.2)     | 2 (1.3)     |                        |
| Manager/Officer                            | 0 (0.0)     | 2 (2.4)     | 1 (0.7)     |                        |
| Company employee (clerical)                | 3 (10.7)    | 9 (10.6)    | 10 (6.7)    |                        |
| Company employee (technical)               | 5 (17.9)    | 2 (2.4)     | 12 (8.1)    |                        |
| Company employee (other)                   | 2 (7.1)     | 12 (14.1)   | 22 (14.8)   |                        |
| Self-employed                              | 2 (7.1)     | 9 (10.6)    | 11 (7.4)    |                        |
| Freelancer                                 | 2 (7.1)     | 2 (2.4)     | 3 (2.0)     |                        |
| Housewife (househusband)                   | 3 (10.7)    | 11 (12.9)   | 25 (16.8)   |                        |
| Part-time job                              | 5 (17.9)    | 14 (16.5)   | 23 (15.4)   |                        |
| Student                                    | 0 (0.0)     | 0 (0.0)     | 6 (4.0)     |                        |
| Other                                      | 0 (0.0)     | 3 (3.5)     | 2 (1.3)     |                        |
| Unemployed                                 | 6 (21.4)    | 20 (23.5)   | 32 (21.5)   |                        |
| Comorbidity                                | 4 (14.3)    | 27 (31.8)   | 53 (35.6)   | <b>0.011</b>           |
| Influenza vaccination after 2019.          | 1 (0.4)     | 8 (9.4)     | 12 (8.1)    | <b>0.002</b>           |
| Infected with SARS-CoV-2                   | 6 (21.4)    | 25 (29.4)   | 36 (24.2)   | <b>0.002</b>           |
| Conspiracy theory                          | 5 (17.9)    | 27 (31.8)   | 56 (37.6)   | <b>0.010</b>           |
| Experience Disadvantages of not vaccinated | 2 (7.1)     | 16 (18.8)   | 20 (13.4)   | <b>0.006</b>           |

We conducted univariable multinomial logistic regression analysis. The significant values are indicated in bold.

According to the exchange rate, as of August 2, 2023, 1 Japanese yen was equal to 0.0070 US dollars.
